# Supplementary material for: Electrochemical kinetic fingerprinting of single-molecule coordinations in confined nanopores
Source: Royal Society of Chemistry journal article supplement (doi:10.1039/d4fd00133h), 2024-06-19
Supplement: d4fd00133h1.pdf [file d4fd00133h1.pdf]

## Supplementary Information

### Electrochemical Kinetic Fingerprinting of Single-Molecule Coordinations in the Confined Nanopores

Chao-Nan Yang<sup>[a]</sup>, Wei Liu<sup>[a]</sup>, Hao-Tian Liu<sup>[a]</sup>, Ji-Chang Zhang<sup>[a]</sup>, Yi-Tao Long<sup>[a]</sup>, Yi-Lun Ying<sup>[a,b]\*</sup>

<sup>a</sup> Molecular Sensing and Imaging Center, School of Chemistry and Chemical Engineering, Nanjing University, Nanjing 210023, P. R. China

<sup>b</sup> Chemistry and Biomedicine Innovation Center, Nanjing University, Nanjing 210023, P. R. China

\* E-mail: yilunying@nju.edu.cn

## Table of Contents

|                                                                                                |   |
|------------------------------------------------------------------------------------------------|---|
| Fig. S1. Current-voltage ( $I$ - $V$ ) curves of K238H-AeL, S276H-AeL and WT-AeL nanopore..... | 3 |
| Fig. S2. Control experiment of WT-AeL nanopore.....                                            | 4 |
| Fig. S3. MD simulations of K238H-AeL nanopore and S276H-AeL nanopore.....                      | 5 |
| Table. S1. Distance of N atom to O atom in K238H-AeL or S276H-AeL.....                         | 5 |
| Author Contributions.....                                                                      | 6 |

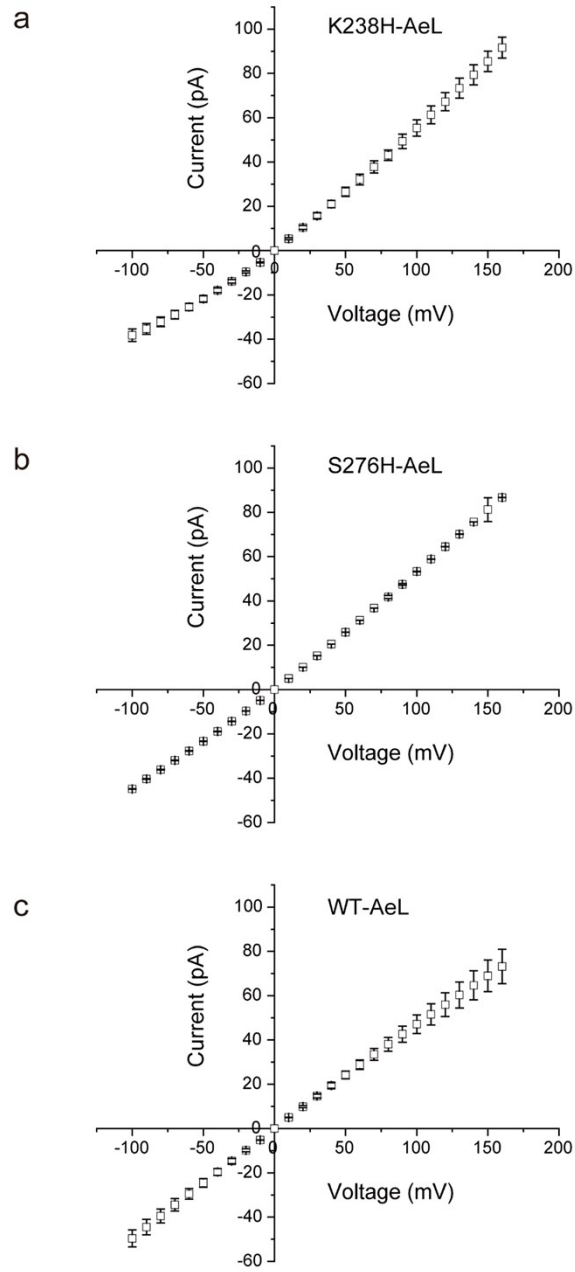

**Fig. S1.** Current-voltage ( $I$ - $V$ ) curves of (a) K238H-AeL, (b) S276H-AeL and (c) WT-AeL nanopore. The data were acquired in the condition of 1.0 M KCl, 10 mM Tris, and 1.0 mM EDTA at pH 8.0. The error bars are the standard error of the mean (s.e.m) for 3 independent experiments.

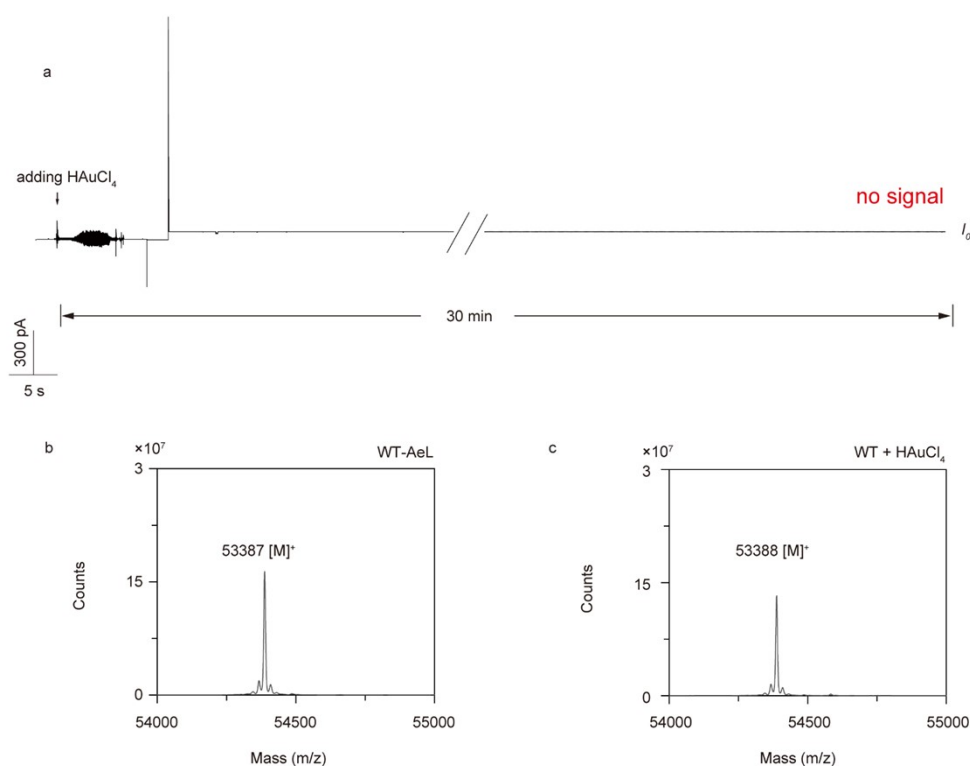

**Fig. S2.** Control experiment of WT-AeL nanopore. (a) The current trace of WT-AeL nanopore treated with the 0.5 mM  $\text{HAuCl}_4$ , the current trace was acquired in the condition of 1.0 M KCl, 10 mM Tris, and 1.0 mM EDTA at pH 8.0. The applied voltage is +100 mV. No reaction event occurs between WT-AeL nanopore and the  $\text{HAuCl}_4$  after recording within 30 min; (b) The mass spectrometry of WT Pro-aerolysin; (c) The mass spectrometry of WT Pro-aerolysin incubated with Au(III). The  $[\text{M}]^+$  peaks at  $m/z = 53387 \pm 1$  and  $m/z = 53388 \pm 1$  are both assigned to unreacted WT Pro-aerolysin. The concentration of Au(III) is 0.5 mM, and the experiments were performed in the buffer of 10 mM Tris, at  $22 \pm 2$  °C.

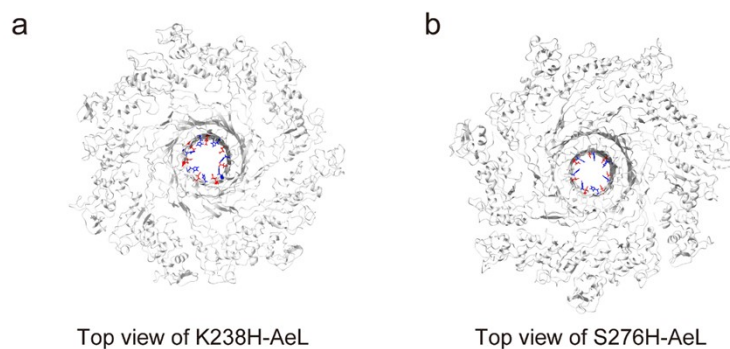

**Fig. S3.** MD simulations of K238H-AeL nanopore and S276H-AeL nanopore. (a) The top view of K238H-AeL nanopore. K238H is shown in blue, E258 site is shown in red. (b) The top view of S276H-AeL nanopore. K238H is shown in blue, D222 site is shown in red. The equilibrated time is 5 ns.

**Table. S1.** Distance of N atom to O atom in K238H-AeL or S276H-AeL

| Distance of the N atom to O atom | $d(\text{K238H-AeL}) / \text{\AA}^*$ | $d(\text{S276H-AeL}) / \text{\AA}^{\&}$ |
|----------------------------------|--------------------------------------|-----------------------------------------|
| $d_1$                            | 4.4                                  | 6.1                                     |
| $d_2$                            | 4.3                                  | 4.9                                     |
| $d_3$                            | 4.4                                  | 6.6                                     |
| $d_4$                            | 5.3                                  | 4.8                                     |
| $d_5$                            | 4.9                                  | 5.0                                     |
| $d_6$                            | 4.6                                  | 7.3                                     |
| $d_7$                            | 4.4                                  | 7.1                                     |
| Average $d^{\$}$                 | $4.6 \pm 0.3$                        | $6.0 \pm 1.0$                           |

\* The distance of N atom of the imidazole ring in K238H site to O atom of carboxyl in E258 site under K238H-AeL nanopore.

& The distance of N atom of the imidazole ring in S276H site to O atom of carboxyl in D222 site under S276H-AeL nanopore.

$\$$  The average  $d = (d_1 + d_2 + d_3 + d_4 + d_5 + d_6 + d_7) / 7$

**Author Contributions**

Y.-L. Ying and Y.-T. Long conceived idea. C.-N. Yang and conducted the experiment. C.-N. Yang analyzed the data. C.-N. Yang, W. Liu, H.-T. Liu and J.-C. Zhang prepared the manuscript. Y.-L. Ying and Y.-T. Long wrote the manuscript.
